# Supplementary material
Source: MDPI journal article supplement (https://www.mdpi.com/2813-4583/1/3/16)
Supplement: s1 [file s1]

Archive with 1 entries (1 files):
- gucdd-2422233-supplementary.pdf
